# Supplementary material
Source: Springer Nature journal article supplement (https://www.springermedizin.de/resource/supplementary/12936_2013_2883_MOESM7_ESM.pdf/9544476)

**Additional file 7 Incidence rates (cases/1,000 population /survey) observed via active case surveillance in different areas and different study sites in 2010 (A) and 2011 (B).**

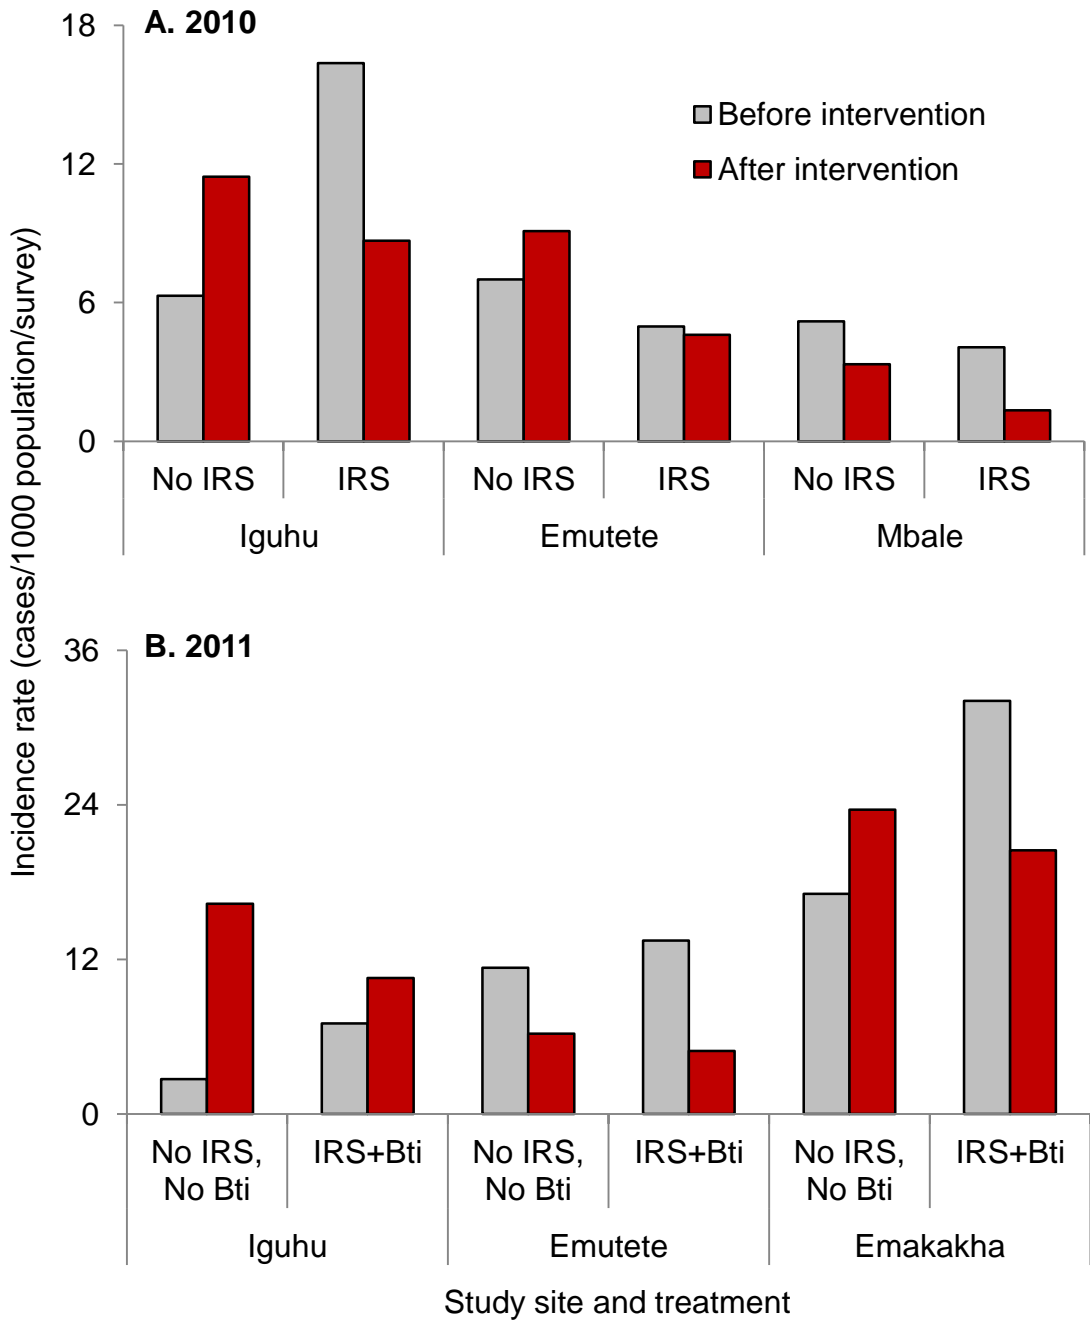

Supplement: MOESM7 [file 9544476]
